# Supplementary material for: Antioxidative activity of methyl amygdalinate from the seeds of Prunus persica and neuroprotective effects on Aβ1–42-induced neurodegeneration models
Source: Royal Society of Chemistry journal article supplement (doi:10.1039/c6ra18913j), 2016-01-01
Supplement: c6ra18913j1.pdf [file c6ra18913j1.pdf]

## Supplementary Figures

### Figure Captions

**Fig. 1**  $^1\text{H}$ -NMR spectrum of MAM

**Fig. 2**  $^{13}\text{C}$ -NMR spectrum of MAM

**Fig. 3** HSQC spectrum of MAM

**Fig. 4** HMBC spectrum of MAM

**Fig. 5** HPLC chromatogram of MAM (content of MAM=95.7% )

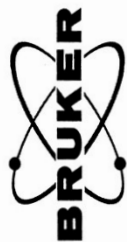

ARX-300-1H  
Sample: T-4

7.554  
7.544  
7.540  
7.528  
7.522  
7.396  
7.386  
7.377  
7.371  
7.361  
7.306  
5.483  
4.452  
4.432  
4.426  
4.206  
4.181  
4.173  
4.168  
4.133  
3.921  
3.916  
3.879  
3.822  
3.805  
3.714  
3.703  
3.680  
3.436  
3.406  
3.376  
3.364  
3.359  
3.350  
3.337  
3.330  
3.324  
3.319  
3.314  
3.304  
3.300  
3.273  
3.269  
3.243

NAME H26  
EXPNO 467  
PROCNO 1  
Date\_ 20101222  
Time 3.03  
INSTRUM arx300  
PROBHD 5 mm QNP 1H  
PULPROG zg30  
TD 32768  
SOLVENT MeOH  
NS 16  
DS 2  
SWH 6250.000 Hz  
FIDRES 0.190735 Hz  
AQ 2.6214900 sec  
RG 715  
DM 80.000 usec  
DE 114.29 usec  
TE 300.0 K  
D1 1.00000000 sec  
D1 12.40 usec  
DE 114.29 usec  
SFO1 300.1318534 MHz  
NUCLEUS 1H  
SI 16384  
SF 300.1300000 MHz  
WDW EM  
SSB 0  
LB 0.30 Hz  
GB 0  
PC 1.00

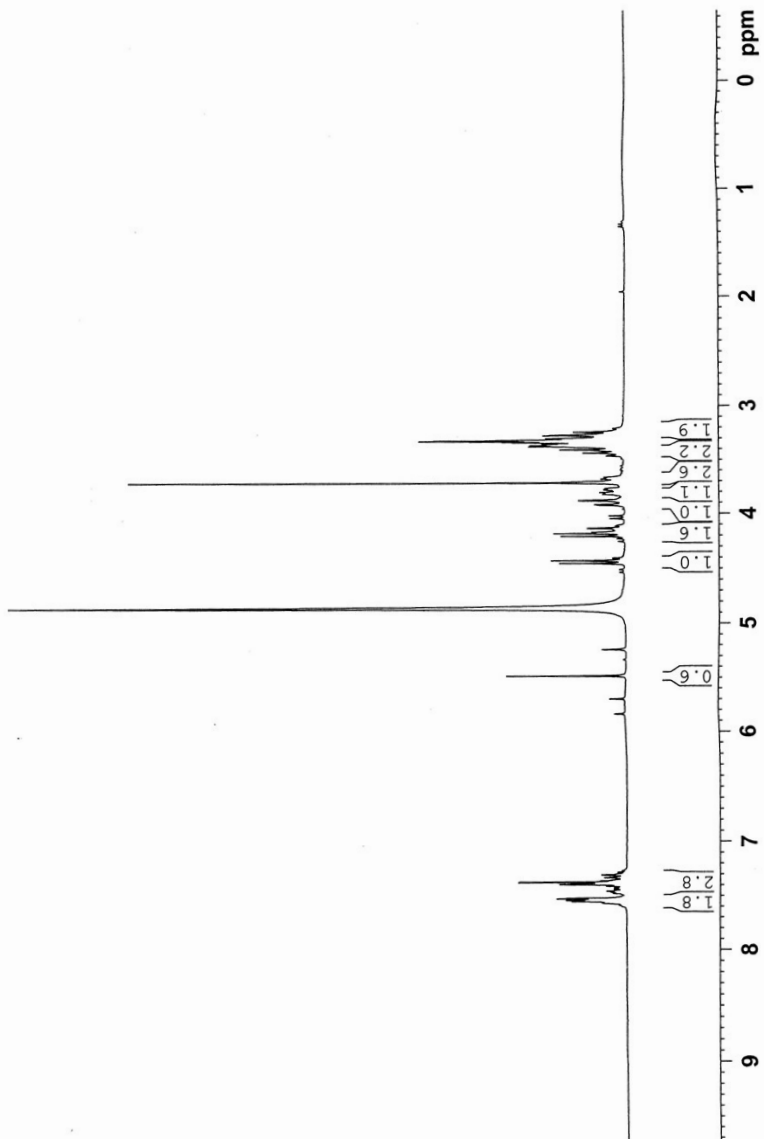

Fig. 1

ARX-500-15C  
 Sample: 7-4

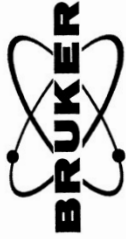

NAME C12  
 EXPNO 192  
 PROCNO 1  
 Date\_ 20110102  
 Time 11:30  
 INSTRUM spect  
 PROBRD 5 mm QNP 1H  
 PULPROG zgpg30  
 TD 65536  
 SOLVENT CDCl3  
 NS 9997  
 DS 2  
 SWH 25000.000 Hz  
 FWHZ 0.381470 Hz  
 EQRES 1.3107700 sec  
 RG 32768  
 DW 20.000 usec  
 DE 28.57 usec  
 TE 300.0 K  
 D12 0.00000000 sec  
 D1 0.00000000 sec  
 D16 0.00000000 sec  
 D1 2.00000000 sec  
 CFPRG maltz16  
 P31 80.00 usec  
 D11 0.03000000 sec  
 DL5 20.00 dB  
 P1 13.70 usec  
 SFO1 500.136 MHz  
 SFO2 75.477501 MHz  
 NUCLEUS 13C  
 SI 32768  
 SF 75.4678277 MHz  
 EM 0  
 WDW 3.00 Hz  
 SSB 0  
 LB 1.0  
 GB 1.40  
 PC 1.40

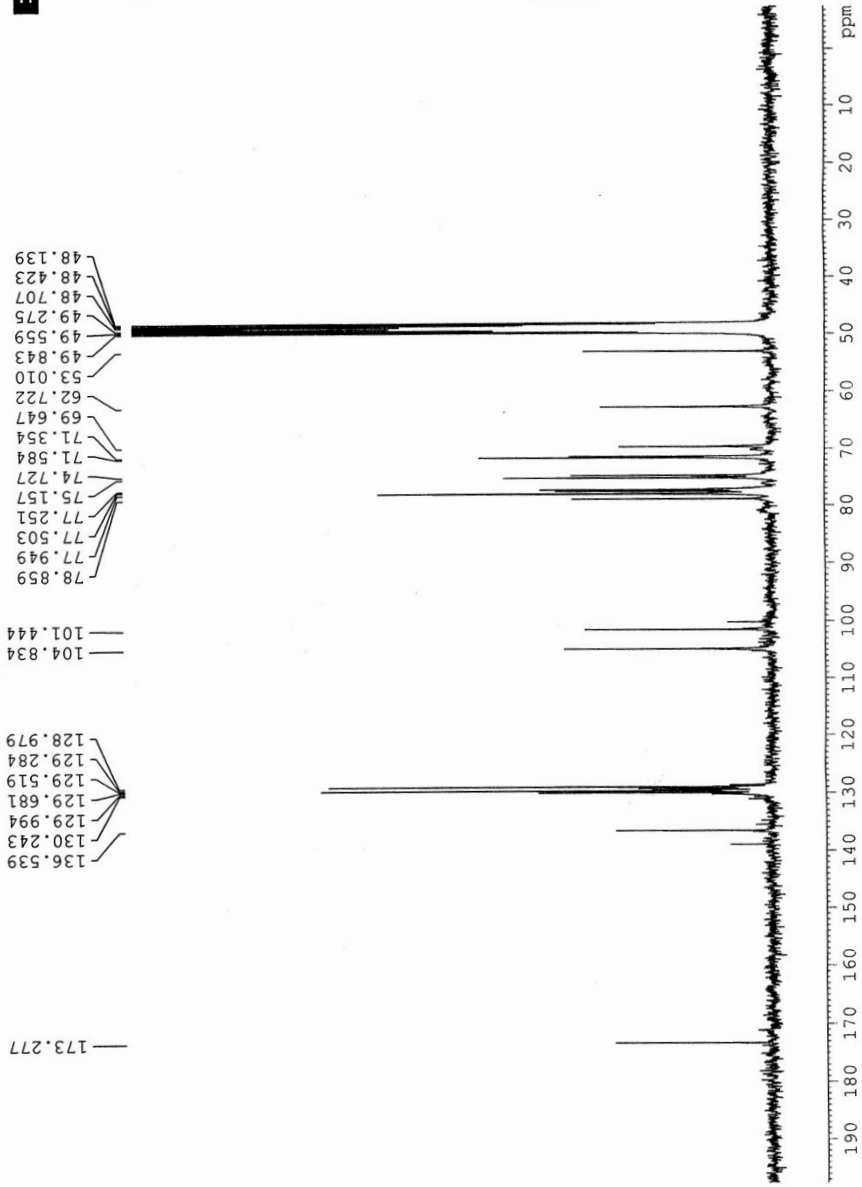

Fig. 2



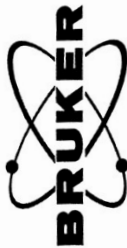

AV-600-HMBC  
Sample:

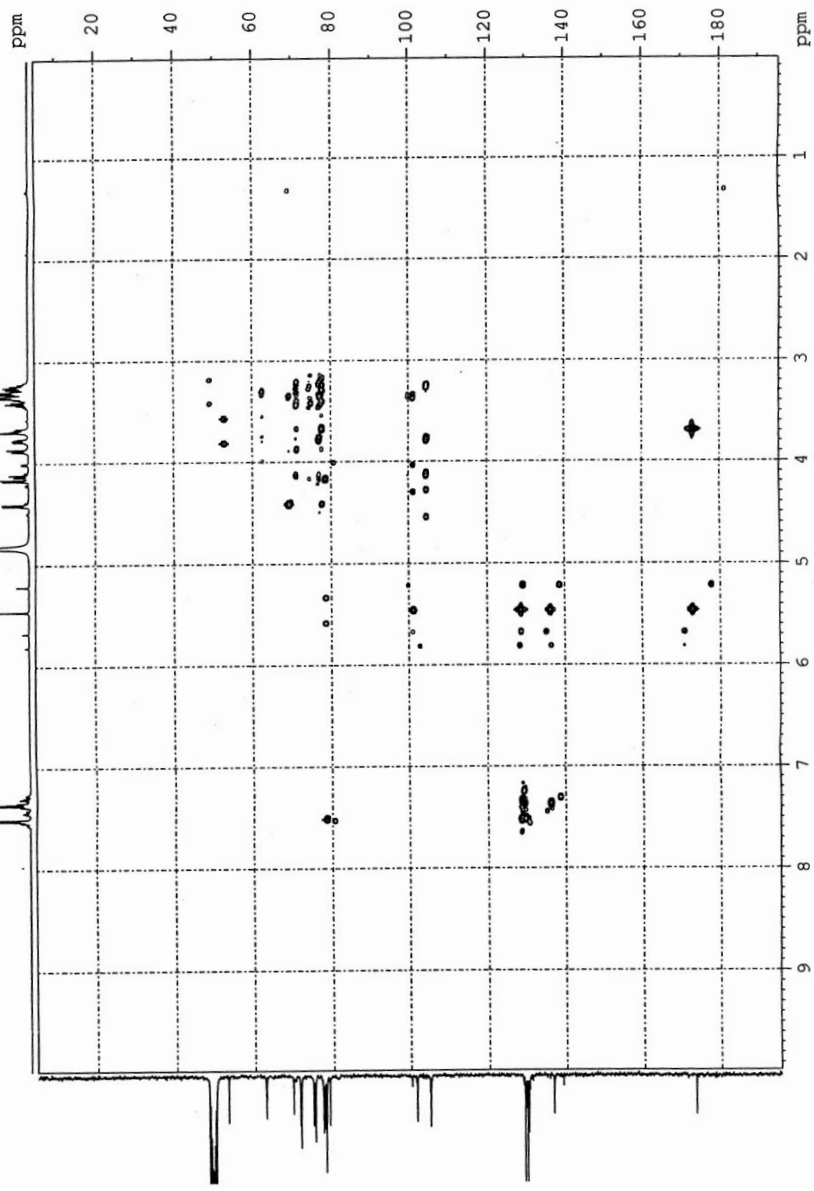

T-4  
 NAME  
 EXPNO 3  
 PROCNO 3  
 DATE\_ 20110108  
 Time 19.50  
 INSTRUM spect  
 PROBHD 5 mm PABBO BB  
 P1PRG hmc-cp-13c  
 TD 1024  
 SOLVENT MeOD  
 NS 80  
 DS 8  
 SWH 6009.415 Hz  
 SF 5.868765 Hz  
 FIDRES 0.0853300 sec  
 AQ 29.00  
 RG 83.20 usec  
 DW 298.20 usec  
 TE 298.2 K  
 CNST2 145.0000000  
 CNST13 5.0000000  
 D1 0.0000000 sec  
 D2 0.00344828 sec  
 D6 0.1000000 sec  
 D16 0.0020000 sec  
 INO 0.0001653 sec  
 ===== CHANNEL f1 =====  
 NUC1 1H  
 P1 11.20 usec  
 PL1 22.20 usec  
 FL1 -4.00 dB  
 PL1W 34.70265579 W  
 SF01 600.1330006 MHz  
 ===== CHANNEL f2 =====  
 NUC2 13C  
 P2 8.80 usec  
 PL2 83.20243100 dB  
 PL2W 150.9178993 MHz  
 SF02  
 ===== GRADIENT CHANNEL =====  
 GENM1 SINE 100  
 GENM2 SINE 100  
 GENM3 SINE 100  
 GP21 50.00 1  
 GP22 30.00 1  
 P12 0.00 usec  
 P13 1000.00 2  
 ND0  
 TD 360  
 SF01 150.9179 MHz  
 SW 200.6000 ppm  
 F1MODE OF  
 SI 1024  
 WCN 600.1330006 MHz  
 WFO SINE 0  
 SSB 0  
 LB 0.00 Hz  
 GB 0  
 PC 1.41  
 SI 1024  
 MC2 OF  
 SF 150.9076356 MHz  
 WCN SINE 0  
 SSB 0  
 LB 0.00 Hz  
 SE

Fig. 4

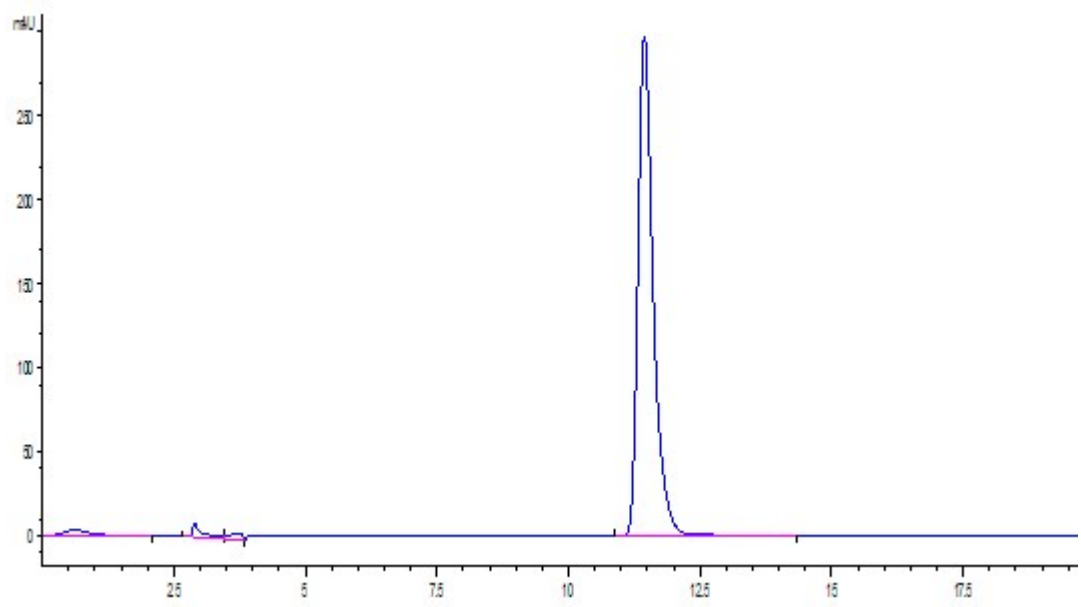

**Fig. 5**
